# Supplementary material for: Microbial Community Establishment, Succession, and Temporal Dynamics in an Industrial Semi-Synthetic Metalworking Fluid Operation: A 50-Week Real-Time Tracking
Source: MDPI journal article supplement (doi:10.3390/microorganisms12020267), 2024-01-26
Supplement: s1 [file s1]

**Supplementary Table S1.** Non-biological information on the samples from industrial Semi-Synthetic metalworking fluid operation

| Sample No.                           | Fluid details                             |                    |      |                |           | Biocide addition |       | Oil content |           | Dip slide (Biostrip) |
|--------------------------------------|-------------------------------------------|--------------------|------|----------------|-----------|------------------|-------|-------------|-----------|----------------------|
|                                      | New additions                             | Final dilution (%) | pH   | Ammonia odor # | Amine (%) | Type             | Conc. | Tramp oil   | Total oil |                      |
| Before Dump                          | NA                                        | NA                 | NA   | NA             | NA        | NA               | NA    | NA          | NA        | NA                   |
| Neat (Sample made-up in the lab) # 1 |                                           | NA                 | NA   | NA             | NA        | NA               | NA    | NA          | NA        | NA                   |
| Non-circulated # 1                   | Klear Kool 3089 (Fresh addition/recharge) | NA                 | NA   | NA             | NA        | NA               | NA    | NA          | NA        | NA                   |
| Recirculated/SS1 (wk 00)             | -                                         | NA                 | NA   | NA             | NA        | -                | -     | NA          | NA        | NA                   |
| SS2 (wk 01)                          | -                                         | 10                 | 8.7  | none           | NA        | -                | -     | 1           | 1.2       | 10 <sup>3</sup>      |
| SS3 (wk 02)                          | -                                         | 10                 | 9.46 | none           | NA        | -                | -     | 3.0         | 7.0       | 10 <sup>5</sup>      |
| SS4 (wk 03)                          | -                                         | 12                 | 9.26 | none           | NA        | -                | -     | 4.5         | 8.6       | 10 <sup>2</sup>      |
| SS5 (wk 04)                          | -                                         | 8.5                | 8.97 | none           | NA        | -                | -     | 3.5         | 8         | 10 <sup>3</sup>      |
| SS6 (wk 05)                          | -                                         | 12                 | 9.28 | none           | NA        | 1000g Kathon 893 | NA    | 3.5         | 8         | Mold presence        |
| SS7 (wk 06)                          | -                                         | 9                  | 9.08 | none           | NA        | -                | -     | 5           | 10        | NA                   |
| SS8 (wk 07)                          | 3 gal Amp 95                              | 10                 | 9.25 | none           | NA        | -                | -     | 6.5         | 10        | 10 <sup>3</sup>      |
| SS9 (wk 08)                          | -                                         | 9                  | 9.15 | none           | NA        | -                |       | 7.0         | 10        | 0                    |
| SS10 (wk 09)                         | 10 gal Klear Cool                         | 11                 | 9.10 | none           | NA        | -                | -     | 5.0         | 10        | 0                    |
| SS11 (wk 10)                         | -                                         | 9                  | 9.17 | none           | NA        | 1000g Kathon 893 | NA    | 2.5         | 7.0       | 10 <sup>3</sup>      |
| SS12 (wk 11)                         | -                                         | 9                  | 8.95 | NA             | NA        | -                | -     | 3.0         | 5.7       | 0                    |
| SS13 (wk 12)                         | -                                         | 9                  | 8.86 | none           | NA        | 500 g Kathon     | NA    | 4.0         | 7.8       | NA                   |

|                     |                                                  |      |      |      |    |                    |    |            |            |                     |
|---------------------|--------------------------------------------------|------|------|------|----|--------------------|----|------------|------------|---------------------|
|                     |                                                  |      |      |      |    | 893                |    |            |            |                     |
| SS14 (wk 13)        | 33 gal Klear Cool                                | 8.5  | 8.80 | none | NA | -                  | -  | 2.0        | 5.7        | NA                  |
| SS15 (wk 14)        | 33 gal Klear Cool                                | 8.5  | 8.87 | none | NA | -                  | -  | 2.0        | 6.0        | NA                  |
| SS16 (wk 15)        | -                                                | 11   | 9.16 | none | NA | 3 gal Grotan       | NA | 1.5        | 5.5        | 10 <sup>5</sup>     |
| SS17 (wk 16)        | -                                                | 8.5  | 8.89 | none | NA | -                  | -  | 1.5        | 4.0        | 10 <sup>3</sup>     |
| Neat # 1            | Klear Cool                                       | 9.0  | 9.6  | none | NA | -                  | -  | 0          | 2.0        | 0                   |
| Non –circulated # 2 | Fresh recharge of 140 gallons of Klear Kool 3089 | 9.0  | 10.0 | none | NA | -                  | -  | 0          | 2.0        | 0                   |
| SS18 (wk 18)        | -                                                | 9    | 9.60 | none | NA | -                  | -  | 0          | 2.0        | 0                   |
| SS19 (wk 19)        | -                                                | 11   | 8.65 | none | NA | -                  | -  | 1.0        | 5.0        | 0                   |
| SS20 (wk 20)        | -                                                | 11   | 8.97 | none | NA | -                  | -  | 1.0        | 4.0        | 10 <sup>3</sup>     |
| SS21 (wk 21)        | 40 gal Klear Cool                                | 4.5  | 9.13 | none | NA | -                  | -  | 1.0        | 4.0        | 10 <sup>3</sup>     |
| SS22 (wk 22)        | NA                                               | NA   | NA   | none | NA | -                  | -  | NA         | NA         | NA                  |
| SS23 (wk 23)        | NA                                               | NA   | NA   | none | NA | -                  | -  | NA         | NA         | NA                  |
| SS24 (wk 24)        | 30 gal Klear Cool                                | 11.0 | 8.9  | none | NA | -                  | -  | 0.5        | 7.0        | 10 <sup>3</sup>     |
| SS25 (wk 25)        | -                                                | 10.0 | 9.0  | none | NA | -                  | -  | 0.5        | 6.5        | 10 <sup>3</sup>     |
| SS26 (wk 28)        | -                                                | 8.5  | 8.9  | none | NA | -                  | -  | 1.0        | 3.0        | ND                  |
| SS27 (wk 30)        | -                                                | 10   | 8.98 | none | NA | 871gms Kathon 886  | NA | No reading | No reading | Fungus odor present |
| SS28 (wk 32)        | -                                                | 8.5  | ND   | none | NA | -                  | -  | No reading | No reading | ND                  |
| SS29 (wk 34)        | -                                                | 10   | ND   | none | NA | -                  | -  | No reading | No reading | ND                  |
| SS30 (wk 36)        | -                                                | 11   | 9.3  | none | NA | 871 gms Kathon 886 | NA | 1.0        | 3.0        | Fungus odor         |
| SS31(wk 38)         | 10 gal of Klear                                  | 11   | 9.3  | none | NA | -                  | -  | 1.0        | 3.0        | ND                  |

|              |                              |      |      |      |    |                       |    |     |     |    |
|--------------|------------------------------|------|------|------|----|-----------------------|----|-----|-----|----|
|              | kool 3089                    |      |      |      |    |                       |    |     |     |    |
| SS32 (wk 40) | -                            | 10.5 | 9.5  | none | NA | -                     | -  | 1.0 | 3.0 | ND |
| SS33 (wk 42) | 20 gal of Klear<br>kool 3089 | 10.5 | ND   | none | NA | -                     | -  | 1.0 | 3.0 | ND |
| SS34 (wk 44) | 30 gal of Klear<br>kool 3089 | 11.0 | 9.5  | none | NA | none                  | -  | 1.0 | 3.0 | ND |
| SS35 (wk 46) | -                            | 12.5 | 9.2  | none | NA | none                  | -  | 1.0 | 3.0 | ND |
| SS36(wk 48)  | -                            | 11   | 9.0  | none | NA | none                  | -  | 1.0 | 3.0 | ND |
| SS37(wk 50)  | -                            | 12.0 | 7.97 | none | NA | 845 gms Kathon<br>886 | NA | 3.0 | 6.0 | ND |

NA –not available ND – not done
